# Supplementary material for: The removal of Cd(ii) by the UV/permanganate process: role of continuously in situ formed MnO2 and reactive species
Source: Royal Society of Chemistry journal article supplement (doi:10.1039/d3ew00345k), 2023-01-01
Supplement: d3ew00345k1.pdf [file d3ew00345k1.pdf]

**Supporting Information for**

**The removal of Cd(II) by the UV/permanaganate process: Role of continuous *in situ* formed MnO<sub>2</sub> and reactive species**

Wenrui Wei <sup>a,b,1</sup>, Xinwen Kang <sup>c,1</sup>, Sining Wu <sup>a</sup>, Virender K. Sharma <sup>d</sup>, Ruijie Xie <sup>a</sup>, Beicheng Xia <sup>a</sup>,

Kaiheng Guo <sup>a,\*</sup>, Jingyun Fang <sup>a</sup>

<sup>a</sup> Guangdong Provincial Key Laboratory of Environmental Pollution Control and Remediation Technology, School of Environmental Science and Engineering, Sun Yat–Sen University, Guangzhou 510275, China

<sup>b</sup> Guangzhou Environmental Protection Investment Group Co., Ltd., Guangzhou 510170, China

<sup>c</sup> Chengdu Academy of Environmental Sciences, Chengdu 610072, China

<sup>d</sup> Department of Environmental and Occupational Health, School of Public Health, Texas A&M University, College Station, Texas 77843, United States

\* Corresponding author, phone: +86–15692415065; e–mail: guokh3@mail.sysu.edu.cn.

<sup>1</sup> Shared the first authorship

**Submitted to:**

**Environmental Science: Water Research & Technology**

Number of pages (including this page): 17

Number of Text: 1

Number of Figures: 14

## List of captions:

|                                                                                                                                                                                                                                                                                                                                                                                                                                                                                                                                                                                                                                                                                                                                                                                                                              |    |
|------------------------------------------------------------------------------------------------------------------------------------------------------------------------------------------------------------------------------------------------------------------------------------------------------------------------------------------------------------------------------------------------------------------------------------------------------------------------------------------------------------------------------------------------------------------------------------------------------------------------------------------------------------------------------------------------------------------------------------------------------------------------------------------------------------------------------|----|
| Text S1. Calculation method of concentration of $\text{KMnO}_4$ and in situ formed $\text{MnO}_2$ .                                                                                                                                                                                                                                                                                                                                                                                                                                                                                                                                                                                                                                                                                                                          | 3  |
| Figure S1. pH variation during Cd(II) removal by the UV/permanganate process at $\text{pH}_0$ 6.0. Conditions: $[\text{KMnO}_4]_0 = 100 \mu\text{M}$ , $[\text{Cd(II)}]_0 = 20 \mu\text{M}$ .                                                                                                                                                                                                                                                                                                                                                                                                                                                                                                                                                                                                                                | 4  |
| Figure S2. Distribution of Cd(II) species with pH variation.                                                                                                                                                                                                                                                                                                                                                                                                                                                                                                                                                                                                                                                                                                                                                                 | 5  |
| Figure S3. Time-dependent formation of $\text{MnO}_2$ during the Cd(II) removal by the UV/permanganate process at $\text{pH}_0$ 6.0. Conditions: $[\text{KMnO}_4]_0 = 100 \mu\text{M}$ , $[\text{Cd(II)}]_0 = 20 \mu\text{M}$ .                                                                                                                                                                                                                                                                                                                                                                                                                                                                                                                                                                                              | 6  |
| Figure S4. Time-dependent UV-vis spectra at the wavelengths of 200 - 800 nm in the UV/permanganate process with a permanganate dosage of 100 $\mu\text{M}$ (a) in the absence of PP and (b) in the presence of 5 mM PP.                                                                                                                                                                                                                                                                                                                                                                                                                                                                                                                                                                                                      | 7  |
| Figure S5. (a) The effects of PP on Cd(II) removal by prepared $\text{MnO}_2$ . Conditions: $\text{pH} = 6.0$ , $[\text{MnO}_2]_0 = 65 \mu\text{M}$ , $[\text{Cd(II)}]_0 = 20 \mu\text{M}$ , $[\text{PP}] = 5 \text{ mM}$ . (b) UV-vis spectra at the wavelengths of 200 - 800 nm of $\text{MnO}_2$ in the absence/presence of 5 mM PP. Conditions: $\text{pH} = 6.0$ , $[\text{MnO}_2]_0 = 65 \mu\text{M}$ , $[\text{Cd(II)}]_0 = 20 \mu\text{M}$ , $[\text{PP}] = 5 \text{ mM}$ .                                                                                                                                                                                                                                                                                                                                          | 8  |
| Figure S6. The kinetics of Cd(II) removal by the $\text{MnO}_2$ /permanganate and UV/ $\text{MnO}_2$ process. Conditions: $\text{pH}_0 = 6.0$ and 8.0, $[\text{MnO}_2]_0 = [\text{KMnO}_4]_0 = 65 \mu\text{M}$ , $[\text{Cd(II)}]_0 = 20 \mu\text{M}$ .                                                                                                                                                                                                                                                                                                                                                                                                                                                                                                                                                                      | 9  |
| Figure S7. (a) Adsorption isotherm of Cd(II) onto $\text{MnO}_2$ . Conditions: $\text{pH}_0 = 6.0$ , $[\text{MnO}_2]_0 = 100 \mu\text{M}$ , $[\text{Cd(II)}]_0 = 1 - 100 \mu\text{M}$ . XPS spectra of (b) Cd 3d <sub>5/2</sub> , (c) O 1s of $\text{MnO}_2$ adsorbed Cd(II) matching Langmuir fit curves. Conditions: $\text{pH}_0 = 6.0$ , $[\text{MnO}_2]_0 = 100 \mu\text{M}$ , $[\text{Cd(II)}]_0 = 2 \mu\text{M}$ . (d) O 1s spectra of $\text{MnO}_2$ generated in UV/permanganate process without Cd(II). Conditions: $\text{pH}_0 = 6.0$ , $[\text{MnO}_2]_0 = 100 \mu\text{M}$ . XPS spectra of (e) Cd 3d <sub>5/2</sub> , (f) O 1s of $\text{MnO}_2$ adsorbed Cd(II) matching linear fit curves. Conditions: $\text{pH}_0 = 6.0$ , $[\text{MnO}_2]_0 = 100 \mu\text{M}$ , $[\text{Cd(II)}]_0 = 100 \mu\text{M}$ . | 10 |
| Figure S8. Removal rate of Cd(II) by the (a) UV irradiation and (b) permanganate at $\text{pH}_0$ 5.0 - 7.0. Conditions: $[\text{KMnO}_4]_0 = 100 \mu\text{M}$ , $[\text{Cd(II)}]_0 = 20 \mu\text{M}$ .                                                                                                                                                                                                                                                                                                                                                                                                                                                                                                                                                                                                                      | 11 |
| Figure S9. Effect of $\text{pH}_0$ on $\text{MnO}_2$ generation in the UV/permanganate process during Cd(II) removal. Conditions: $\text{pH}_0 = 5.0 - 7.0$ , $[\text{KMnO}_4]_0 = 100 \mu\text{M}$ , $[\text{Cd(II)}]_0 = 20 \mu\text{M}$ .                                                                                                                                                                                                                                                                                                                                                                                                                                                                                                                                                                                 | 12 |
| Figure S10. pH variation during Cd(II) removal by the (a) UV/permanganate process, (b) UV irradiation and (c) permanganate at $\text{pH}_0$ 5.0 - 7.0. Conditions: $[\text{KMnO}_4]_0 = 100 \mu\text{M}$ , $[\text{Cd(II)}]_0 = 20 \mu\text{M}$ .                                                                                                                                                                                                                                                                                                                                                                                                                                                                                                                                                                            | 13 |
| Figure S11. pH variation during Cd(II) removal by the UV/permanganate process in the presence of cations. Conditions: $[\text{KMnO}_4]_0 = 100 \mu\text{M}$ , $[\text{Cd(II)}]_0 = 20 \mu\text{M}$ , $[\text{Ca(II)}]_0 = [\text{Mg(II)}]_0 = 1 \text{ mM}$ , $\text{pH}_0 = 6.0$ .                                                                                                                                                                                                                                                                                                                                                                                                                                                                                                                                          | 14 |
| Figure S12. SEM-EDS of $\text{MnO}_2$ generated from UV/permanganate process during Cd(II) removal in the presence of (a) Ca(II) and (b) Mg(II). Conditions: $[\text{KMnO}_4]_0 = 100 \mu\text{M}$ , $[\text{Cd(II)}]_0 = 20 \mu\text{M}$ , $[\text{Ca(II)}]_0 = [\text{Mg(II)}]_0 = 1 \text{ mM}$ .                                                                                                                                                                                                                                                                                                                                                                                                                                                                                                                         | 15 |
| Figure S13. pH variation during Cd(II) removal by the UV/permanganate process in the presence of NOM. Conditions: $[\text{KMnO}_4]_0 = 100 \mu\text{M}$ , $[\text{Cd(II)}]_0 = 20 \mu\text{M}$ , $[\text{NOM}]_0 = 3 \text{ mg/L}$ .                                                                                                                                                                                                                                                                                                                                                                                                                                                                                                                                                                                         | 16 |
| Figure S14. (a) The final testing solution of Cd(II) removal by the UV/ $\text{KMnO}_4$ process in tap water for 1 h. (b) The time-dependent concentration of colloidal $\text{MnO}_2$ during Cd(II) removal by UV/ $\text{KMnO}_4$ in tap water. Conditions: $[\text{KMnO}_4]_0 = 100 \mu\text{M}$ , $[\text{Cd(II)}]_0 = 20 \mu\text{M}$ , $\text{pH}_0 = 6.0$ .                                                                                                                                                                                                                                                                                                                                                                                                                                                           | 17 |

**Text S1.** Calculation method of concentration of  $\text{KMnO}_4$  and in situ formed  $\text{MnO}_2$ .

$\text{KMnO}_4$  concentration can be determined by UV/vis spectrophotometry (TU-1900, Persee Co., China) at 418 and 525 nm simultaneously by Equation S4 derived from Equations S1 - S3, while  $\text{MnO}_2$  was determined at 418 nm. Note that permanganate shows negligible absorbance at 418 nm.

$$A_t^{525} = [\text{Mn(VII)}]_t \epsilon_{\text{KMnO}_4}^{525} + [\text{MnO}_2]_t \epsilon_{\text{MnO}_2}^{525} \quad (\text{S1})$$

$$[\text{Mn(VII)}]_t = (A_t^{525} - \epsilon_{\text{MnO}_2}^{525} [\text{MnO}_2]_t) / \epsilon_{\text{KMnO}_4}^{525} \quad (\text{S2})$$

$$[\text{Mn(VII)}]_t = (A_t^{525} - \epsilon_{\text{MnO}_2}^{525} A_t^{418} / \epsilon_{\text{MnO}_2}^{418}) / (A_0^{525} / [\text{Mn(VII)}]_0) \quad (\text{S3})$$

$$[\text{Mn(VII)}]_t = (A_t^{525} - A_f^{525} A_t^{418} / A_f^{418}) / (A_0^{525} / [\text{Mn(VII)}]_0) \quad (\text{S4})$$

where  $A$  means the absorbance, the superscript means wavelength, and the sub-scripts 0, f, and t represent initial, final, and variable time. In this study, the  $\text{KMnO}_4$  was irradiated by ultra-violet for 3 hours to completely transform to  $\text{MnO}_2$  colloids and then immediately measure the final absorbance.

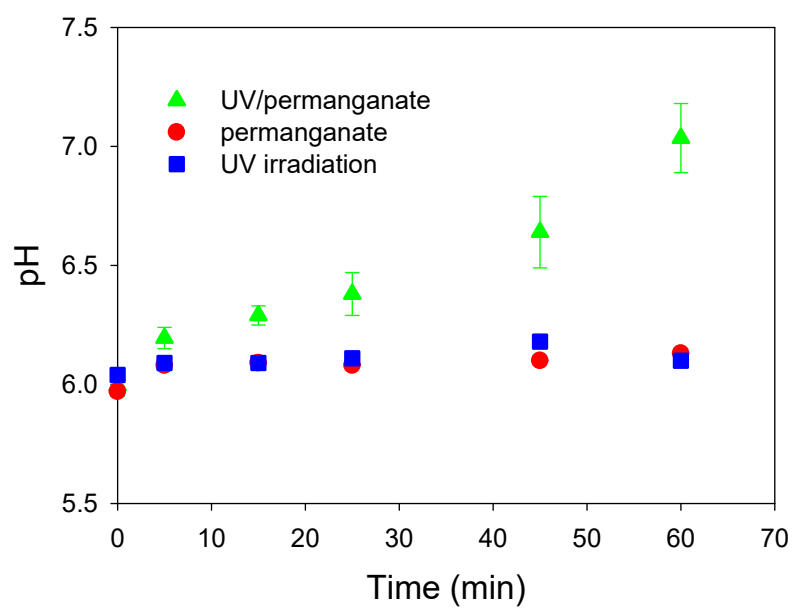

**Figure S1.** pH variation during Cd(II) removal by the UV/permanganate process at pH<sub>0</sub> 6.0.

Conditions: [KMnO<sub>4</sub>]<sub>0</sub> = 100 μM, [Cd(II)]<sub>0</sub> = 20 μM.

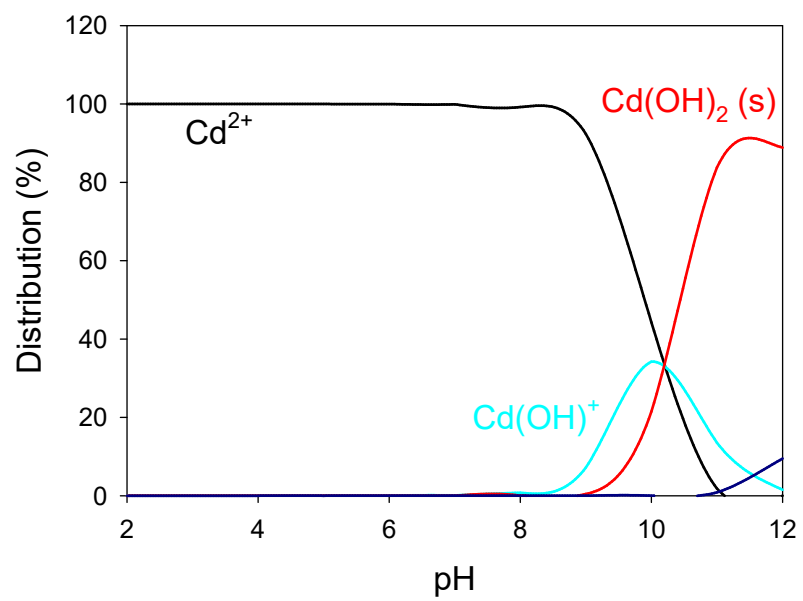

**Figure S2.** Distribution of Cd(II) species with pH variation.

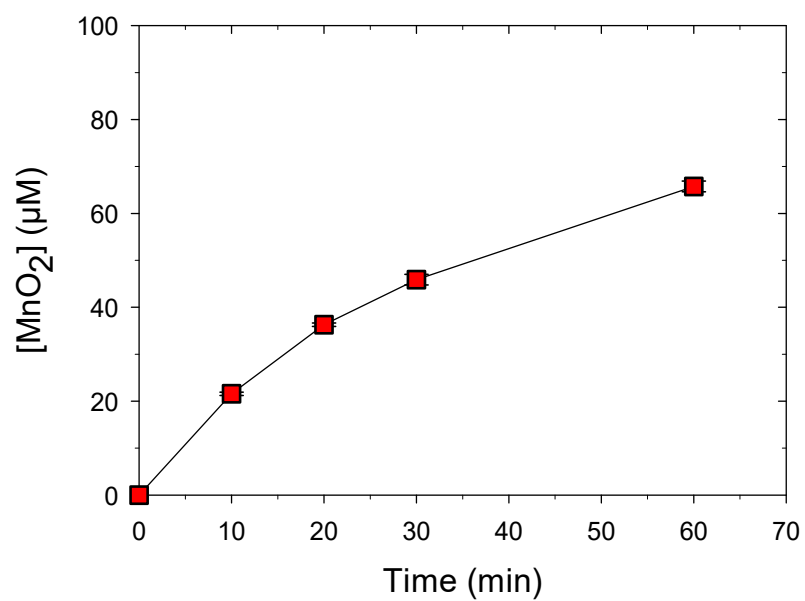

**Figure S3.** Time-dependent formation of MnO<sub>2</sub> during the Cd(II) removal by the UV/permanganate process at pH<sub>0</sub> 6.0. Conditions: [KMnO<sub>4</sub>]<sub>0</sub> = 100 μM, [Cd(II)]<sub>0</sub> = 20 μM.

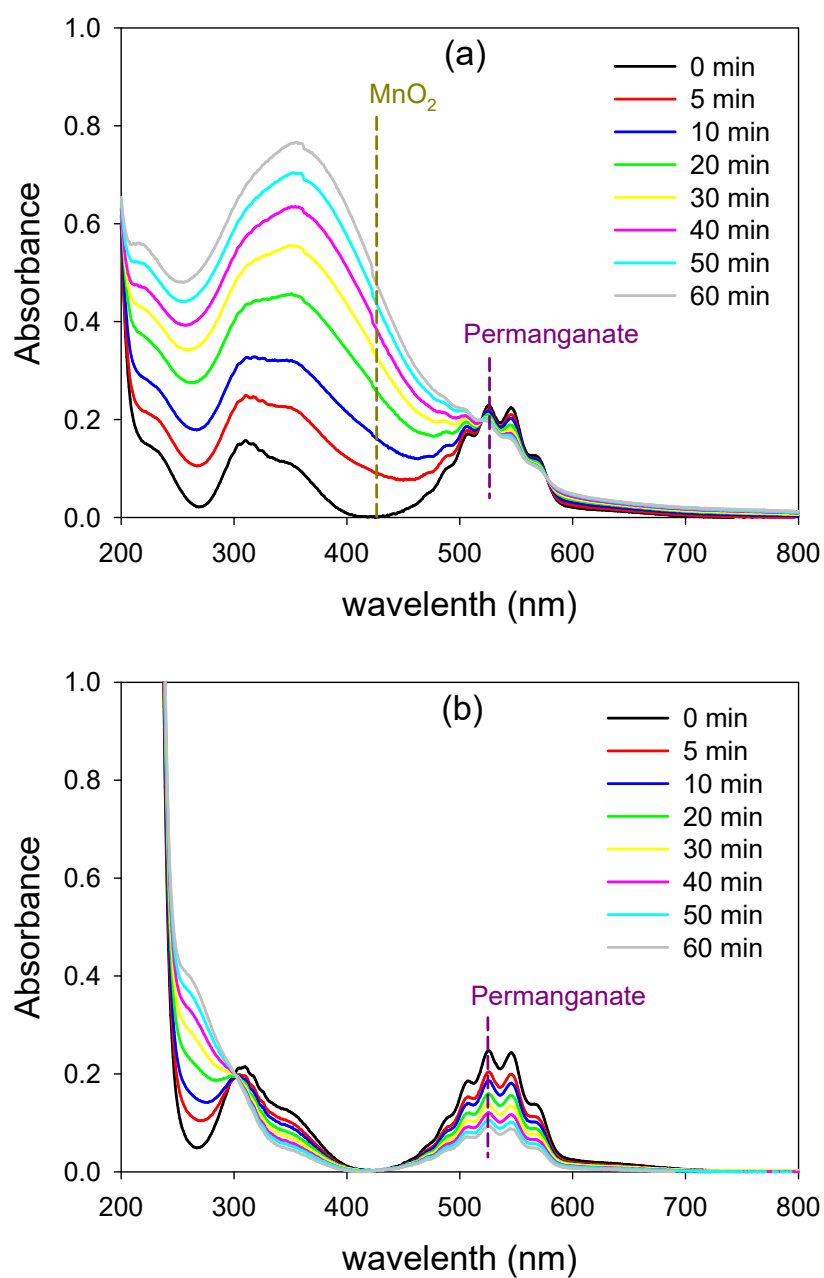

**Figure S4.** Time-dependent UV-vis spectra at the wavelengths of 200 - 800 nm in the UV/permanganate process with a permanganate dosage of 100  $\mu\text{M}$  (a) in the absence of PP and (b) in the presence of 5 mM PP.

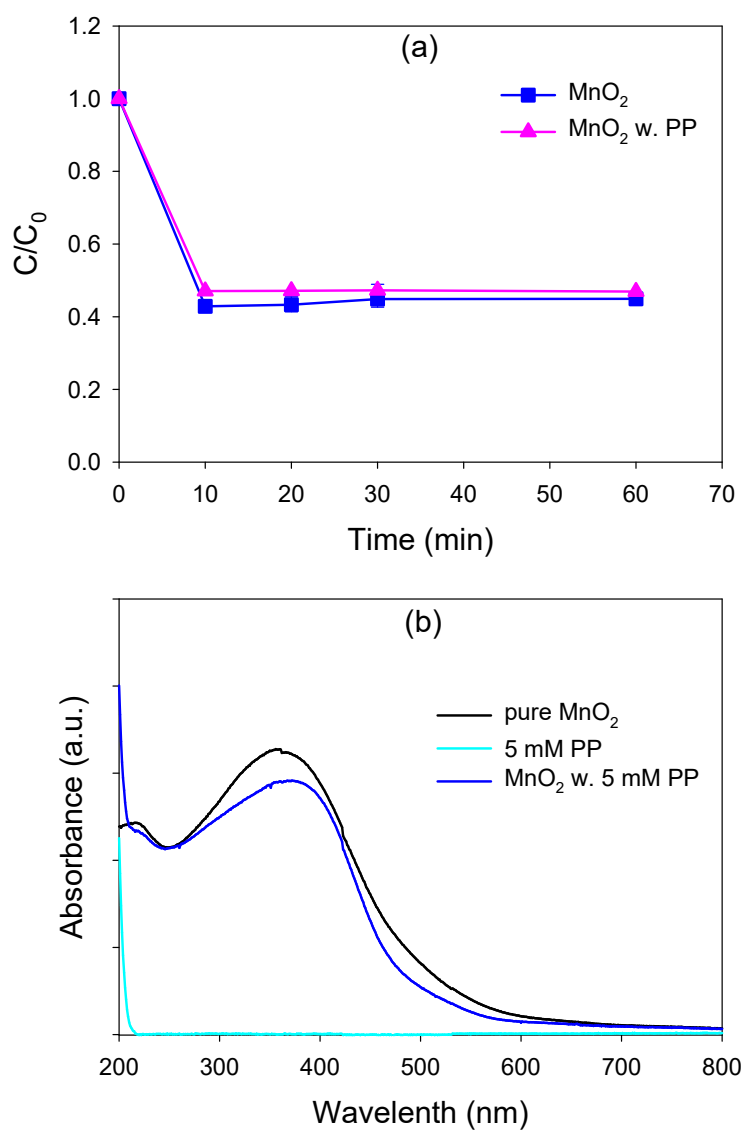

**Figure S5.** (a) The effects of PP on Cd(II) removal by prepared  $MnO_2$ . Conditions: pH = 6.0,  $[MnO_2]_0 = 65 \mu M$ ,  $[Cd(II)]_0 = 20 \mu M$ ,  $[PP] = 5 \text{ mM}$ . (b) UV-vis spectra at the wavelengths of 200 - 800 nm of  $MnO_2$  in the absence/presence of 5 mM PP. Conditions: pH = 6.0,  $[MnO_2]_0 = 65 \mu M$ ,  $[Cd(II)]_0 = 20 \mu M$ ,  $[PP] = 5 \text{ mM}$ .



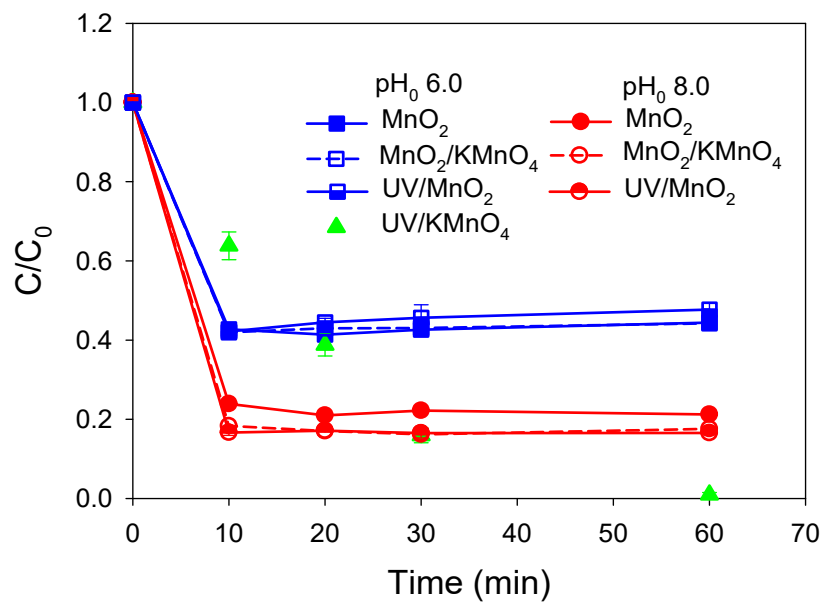

**Figure S6.** The kinetics of Cd(II) removal by the MnO<sub>2</sub>/permanganate and UV/MnO<sub>2</sub> process.

Conditions: pH<sub>0</sub> = 6.0 and 8.0, [MnO<sub>2</sub>]<sub>0</sub> = [KMnO<sub>4</sub>]<sub>0</sub> = 65 μM, [Cd(II)]<sub>0</sub> = 20 μM.

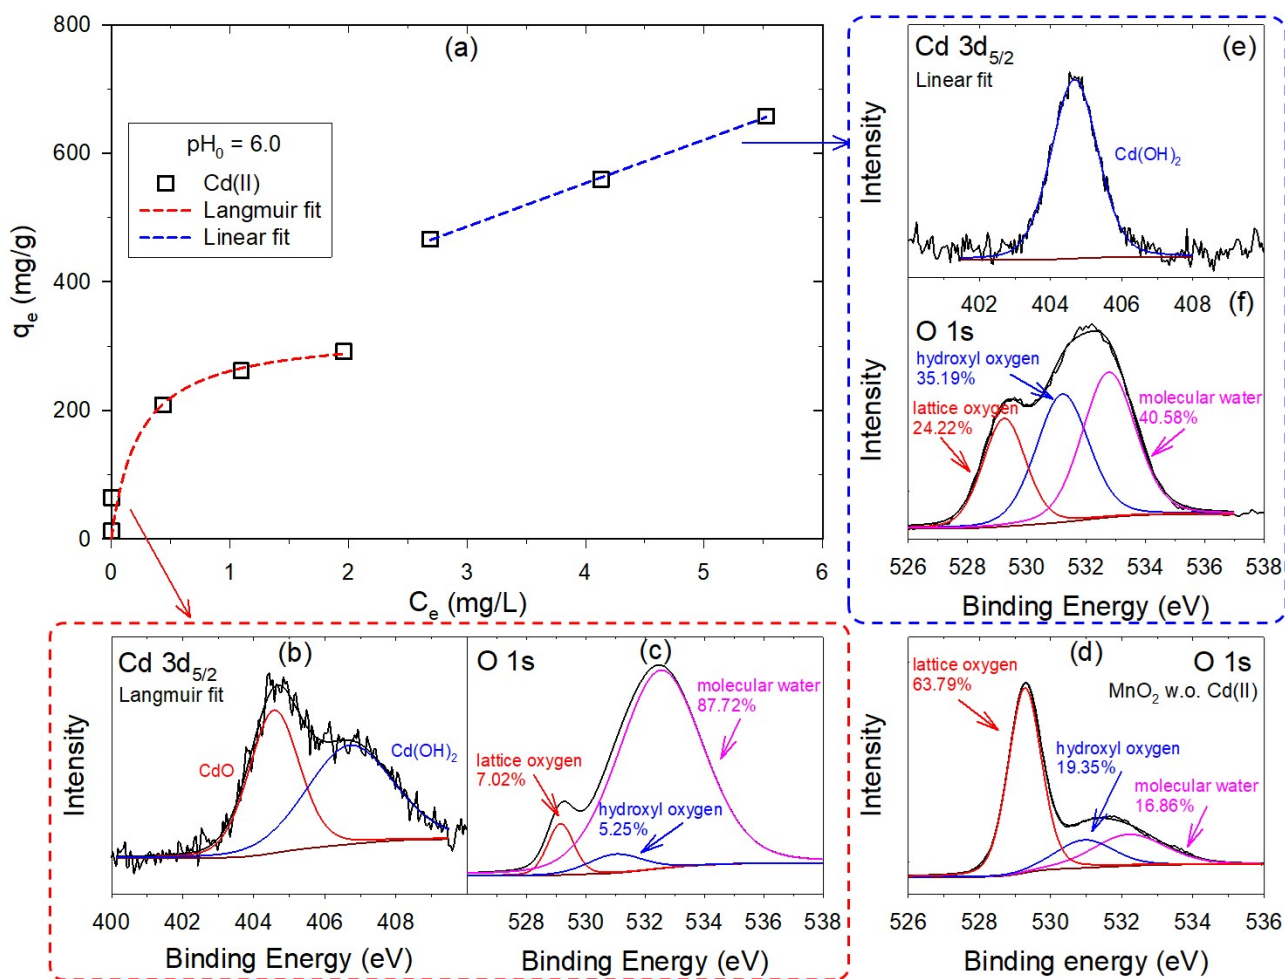

**Figure S7.** (a) Adsorption isotherm of Cd(II) onto MnO<sub>2</sub>. Conditions: pH<sub>0</sub> = 6.0, [MnO<sub>2</sub>]<sub>0</sub> = 100 μM, [Cd(II)]<sub>0</sub> = 1 - 100 μM. XPS spectra of (b) Cd 3d<sub>5/2</sub>, (c) O 1s of MnO<sub>2</sub> adsorbed Cd(II) matching Langmuir fit curves. Conditions: pH<sub>0</sub> = 6.0, [MnO<sub>2</sub>]<sub>0</sub> = 100 μM, [Cd(II)]<sub>0</sub> = 2 μM. (d) O 1s spectra of MnO<sub>2</sub> generated in UV/permanaganate process without Cd(II). Conditions: pH<sub>0</sub> = 6.0, [MnO<sub>2</sub>]<sub>0</sub> = 100 μM. XPS spectra of (e) Cd 3d<sub>5/2</sub>, (f) O 1s of MnO<sub>2</sub> adsorbed Cd(II) matching linear fit curves. Conditions: pH<sub>0</sub> = 6.0, [MnO<sub>2</sub>]<sub>0</sub> = 100 μM, [Cd(II)]<sub>0</sub> = 100 μM.

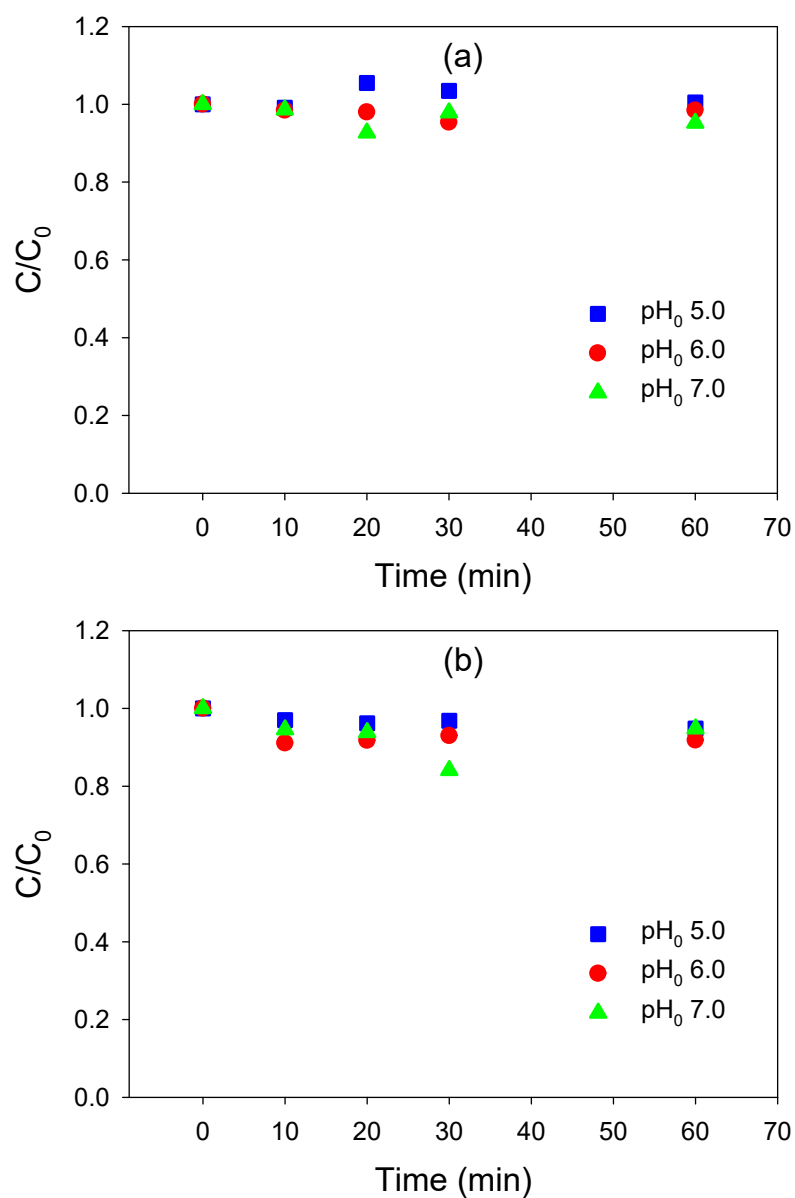

**Figure S8.** Removal rate of Cd(II) by the (a) UV irradiation and (b) permanganate at  $\text{pH}_0$  5.0 - 7.0.

Conditions:  $[\text{KMnO}_4]_0 = 100 \mu\text{M}$ ,  $[\text{Cd(II)}]_0 = 20 \mu\text{M}$ .

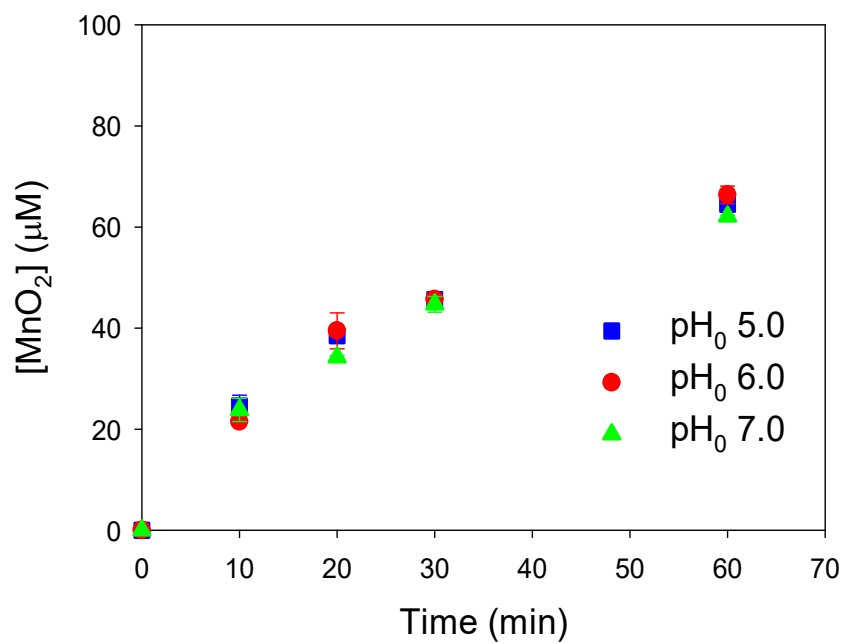

**Figure S9.** Effect of pH<sub>0</sub> on MnO<sub>2</sub> generation in the UV/permanganate process during Cd(II) removal.

Conditions: pH<sub>0</sub> = 5.0 - 7.0, [KMnO<sub>4</sub>]<sub>0</sub> = 100 µM, [Cd(II)]<sub>0</sub> = 20 µM.

**Figure S10.** pH variation during Cd(II) removal by the (a) UV/permanganate process, (b) UV irradiation and (c) permanganate at pH<sub>0</sub> 5.0 - 7.0. Conditions: [KMnO<sub>4</sub>]<sub>0</sub> = 100 μM, [Cd(II)]<sub>0</sub> = 20 μM.

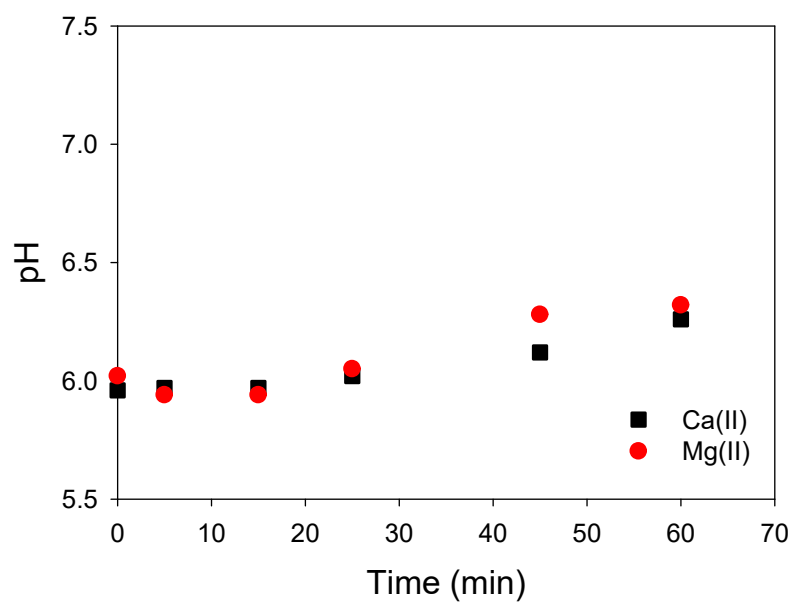

**Figure S11.** pH variation during Cd(II) removal by the UV/permanganate process in the presence of cations. Conditions:  $[\text{KMnO}_4]_0 = 100 \mu\text{M}$ ,  $[\text{Cd(II)}]_0 = 20 \mu\text{M}$ ,  $[\text{Ca(II)}]_0 = [\text{Mg(II)}]_0 = 1 \text{ mM}$ ,  $\text{pH}_0 = 6.0$ .

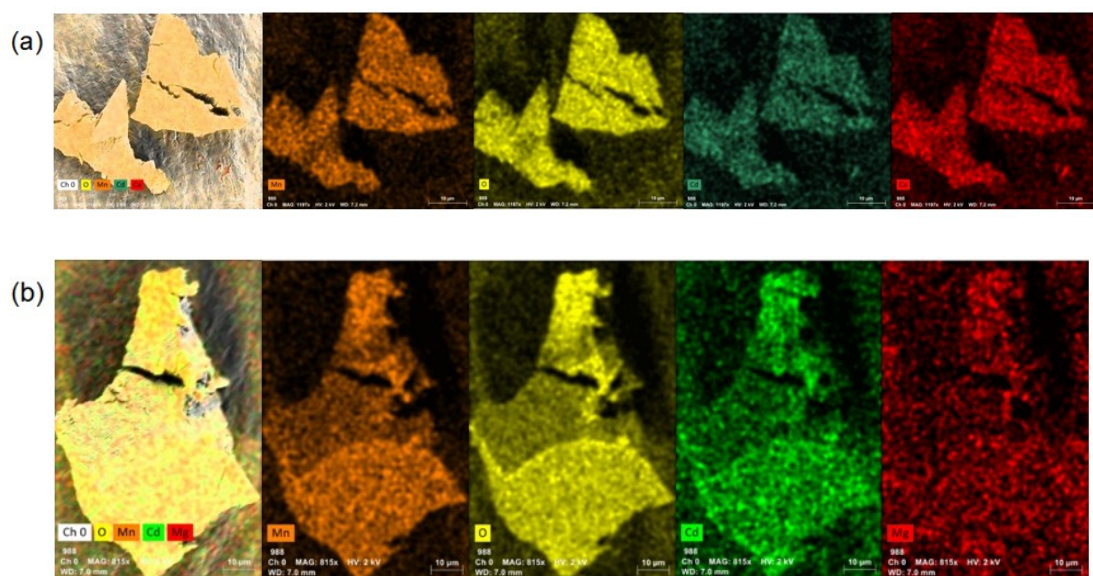

**Figure S12.** SEM-EDS of  $\text{MnO}_2$  generated from UV/permanaganate process during  $\text{Cd(II)}$  removal in the presence of (a)  $\text{Ca(II)}$  and (b)  $\text{Mg(II)}$ . Conditions:  $[\text{KMnO}_4]_0 = 100 \mu\text{M}$ ,  $[\text{Cd(II)}]_0 = 20 \mu\text{M}$ ,  $[\text{Ca(II)}]_0 = [\text{Mg(II)}]_0 = 1 \text{ mM}$ .

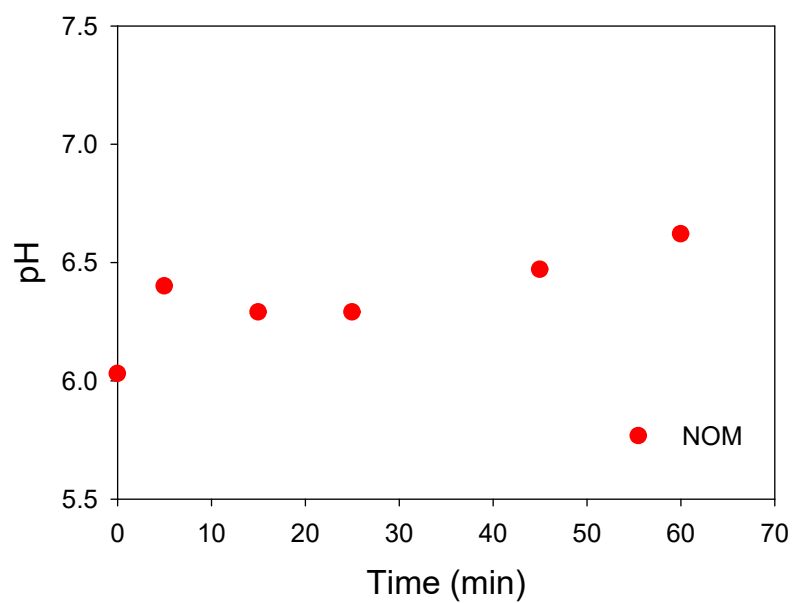

**Figure S13.** pH variation during Cd(II) removal by the UV/permanganate process in the presence of NOM. Conditions:  $[\text{KMnO}_4]_0 = 100 \mu\text{M}$ ,  $[\text{Cd(II)}]_0 = 20 \mu\text{M}$ ,  $[\text{NOM}]_0 = 3 \text{ mg/L}$ .



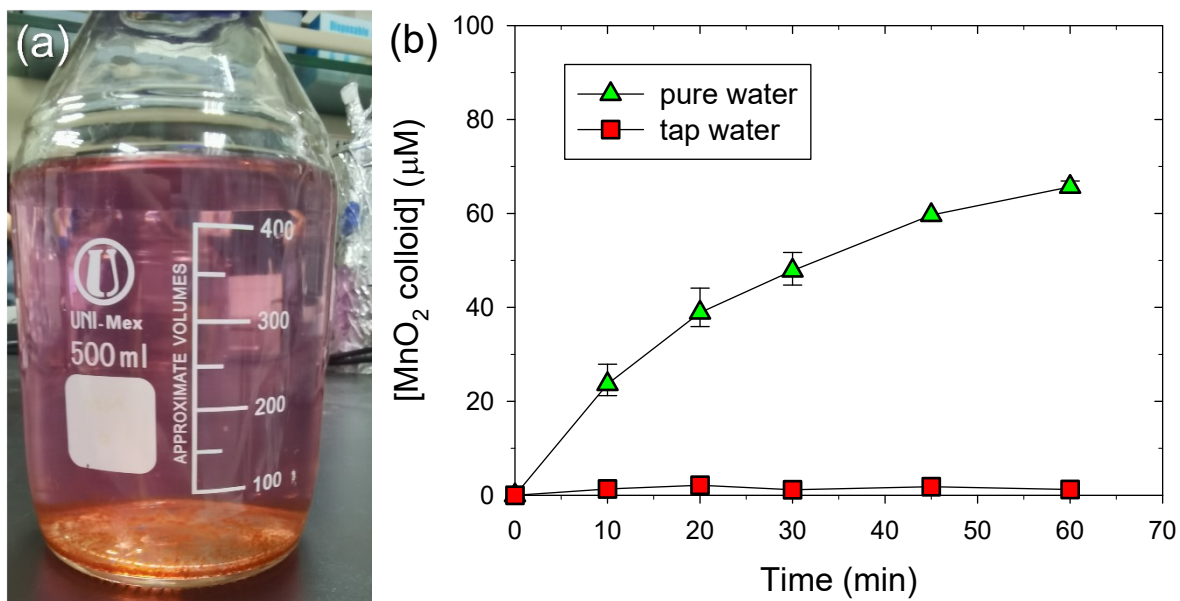

**Figure S14.** (a) The final testing solution of Cd(II) removal by the UV/ $\text{KMnO}_4$  process in tap water for 1 h. (b) The time-dependent concentration of colloidal  $\text{MnO}_2$  during Cd(II) removal by UV/ $\text{KMnO}_4$  in tap water. Conditions:  $[\text{KMnO}_4]_0 = 100 \mu\text{M}$ ,  $[\text{Cd(II)}]_0 = 20 \mu\text{M}$ ,  $\text{pH}_0 = 6.0$ .
